# Supplementary material for: A systematic review of the association between delayed appropriate therapy and mortality among patients hospitalized with infections due to Klebsiella pneumoniae or Escherichia coli: how long is too long?
Source: Springer Nature journal article supplement (doi:10.1186/s12879-018-3524-8), 2018-12-01
Supplement: MOESM1 [file 16317002]

## Additional file 1. Search Algorithms

### MEDLINE (via PubMed)

| Search Number | Search Algorithm                                                                                                                                                                                                                                                                                                                                                                                                                     | Hits    |
|---------------|--------------------------------------------------------------------------------------------------------------------------------------------------------------------------------------------------------------------------------------------------------------------------------------------------------------------------------------------------------------------------------------------------------------------------------------|---------|
| #1            | “delayed appropriate therapy” OR “delayed therapy” OR “delayed antibiotic therapy” OR “delayed drug therapy” OR “delayed appropriate antibiotic therapy” OR “appropriate therapy” OR “appropriate drug therapy” OR “appropriate antibiotic therapy” OR “appropriate antimicrobial treatment” OR “appropriate antimicrobial treatment” OR “adequate treatment” OR “adequate therapy” OR “adequacy of treatment”                       | 76,080  |
| #2            | “delayed inappropriate therapy” OR “delayed inappropriate antibiotic therapy” OR “inappropriate therapy” OR “inappropriate drug therapy” OR “inappropriate antibiotic therapy” OR “incorrect therapy” OR “incorrect antibiotic therapy” OR “incorrect treatment” OR “inadequate antimicrobial treatment” OR “inadequate antimicrobial therapy” OR time-to-therapy OR “time to therapy” OR “Ineffective empirical antibiotic therapy” | 1517    |
| #3            | #1 OR #2                                                                                                                                                                                                                                                                                                                                                                                                                             | 77,299  |
| #4            | “Gram-Negative Bacteria”[MeSH] OR (“Gram negative” AND (bacteria OR bacteremia OR “bloodstream infection” OR bacterium OR infection OR isolate OR culture OR pathogen)) OR “Gram-Negative Bacterial Infections”[MeSH] OR pseudomonas OR Klebsiella pneumoniae OR Enterobacteriaceae                                                                                                                                                  | 806,273 |
| #5            | “Bloodstream infections” OR “Bacteremia” [MeSH] OR bacteremia OR “Intra-abdominal Infections” [MeSH] OR “complicated intra-abdominal infection” OR “intra-abdominal infection” OR “complicated intra-abdominal infection” OR “Urinary Tract Infections” [MeSH] OR “complicated urinary tract infection” OR “urinary tract infection” OR “Pneumonia, Bacterial” [MeSH] OR “bacterial pneumonia”                                       | 133,951 |
| #6            | #4 OR #5                                                                                                                                                                                                                                                                                                                                                                                                                             | 906,189 |
| #7            | #3 AND #6                                                                                                                                                                                                                                                                                                                                                                                                                            | 3533    |

| <b>Search Number</b> | <b>Search Algorithm</b>                                                                                                                                       | <b>Hits</b> |
|----------------------|---------------------------------------------------------------------------------------------------------------------------------------------------------------|-------------|
| <b>#8</b>            | Guideline [pt] OR “practice guideline”[pt] OR Letter [pt] OR editorial [pt] OR review[pt] OR news[pt] OR comment[pt] OR “case reports”[pt] OR “in vitro” [pt] | 5,096,041   |
| <b>#9</b>            | Animals [mh] NOT humans [mh]                                                                                                                                  | 3,895,735   |
| <b>#10</b>           | #7 NOT (#8 OR #9)                                                                                                                                             | 1735        |
| <b>#11</b>           | #10 limited to English publications                                                                                                                           | 1468        |
| <b>#12</b>           | <b>#11 NOT Child: birth–18 years; Infant: birth–23 months</b>                                                                                                 | <b>975</b>  |

## EMBASE

| Search Number | Search Algorithm                                                                                                                                                                                                                                                                                                                                                                                                                                                                                                                                     | Hits    |
|---------------|------------------------------------------------------------------------------------------------------------------------------------------------------------------------------------------------------------------------------------------------------------------------------------------------------------------------------------------------------------------------------------------------------------------------------------------------------------------------------------------------------------------------------------------------------|---------|
| #1            | 'delayed appropriate therapy' OR 'delayed therapy' OR 'delayed drug therapy' OR delayed NEAR/3 therapy OR (delayed NEAR/3 antibiotic AND therapy) OR appropriate NEAR/3 antibiotic OR appropriate NEAR/3 therapy<br>OR 'appropriate therapy' OR 'appropriate drug therapy' OR 'appropriate antibiotic therapy' OR 'appropriate antimicrobial treatment' OR 'appropriate antimicrobial treatment' OR 'adequate treatment' OR 'adequate therapy' OR 'adequacy of treatment'                                                                            | 33,323  |
| #2            | 'delayed inappropriate therapy' OR 'delayed therapy'/exp OR (delayed NEAR/3 antibiotic AND ('therapy'/exp OR therapy)) OR (inappropriate NEAR/3 antibiotic) OR (inappropriate NEAR/3 therapy) OR 'inappropriate therapy' OR 'inappropriate drug therapy' OR 'inappropriate antibiotic therapy' OR 'incorrect therapy' OR 'incorrect antibiotic therapy' OR 'incorrect treatment' OR 'inadequate antimicrobial treatment' OR 'inadequate antimicrobial therapy' OR time-to-therapy OR 'time to therapy' OR 'Ineffective empirical antibiotic therapy' | 10,819  |
| #3            | #1 OR #2                                                                                                                                                                                                                                                                                                                                                                                                                                                                                                                                             | 37,304  |
| #4            | 'Gram negative' OR ('Gram negative' AND (bacteria OR bacteremia OR "bloodstream infection bacterium" OR infection OR isolate OR culture OR pathogen)) OR 'Gram negative bacterium'/exp OR 'Gram negative sepsis'/exp OR 'Gram negative infection'/exp OR pseudomonas OR Klebsiella pneumoniae OR Enterobacteriaceae                                                                                                                                                                                                                                  | 532,479 |
| #5            | 'Bloodstream infections' OR 'bacteremia'/exp OR bacteremia OR 'abdominal infection'/exp OR 'intra-abdominal infection' OR 'complicated intra-abdominal infection' OR 'urinary tract infection'/exp OR 'complicated urinary tract infection' OR 'urinary tract infection' OR 'bacterial pneumonia'/exp OR 'bacterial pneumonia'                                                                                                                                                                                                                       | 119,856 |
| #6            | #4 OR #5                                                                                                                                                                                                                                                                                                                                                                                                                                                                                                                                             | 619,100 |
| #7            | #3 AND #6                                                                                                                                                                                                                                                                                                                                                                                                                                                                                                                                            | 4177    |

| Search Number | Search Algorithm                                                                                                                                                             | Hits        |
|---------------|------------------------------------------------------------------------------------------------------------------------------------------------------------------------------|-------------|
| #8            | [editorial]/lim OR [erratum]/lim OR [letter]/lim OR [note]/lim OR [review]/lim OR 'case report'/de OR 'clinical protocol'/de OR 'letter':it OR 'editorial':it OR 'review':it | 4,220,829   |
| #9            | #7 NOT #8                                                                                                                                                                    | 2734        |
| #10           | #9 AND [humans]/lim                                                                                                                                                          | 2155        |
| #11           | #10 AND [English]/lim                                                                                                                                                        | 2019        |
| #12           | <b>#11 limited to adults</b>                                                                                                                                                 | <b>1035</b> |

## Cochrane Databases

| Search Number | Search Algorithm                                                                                                                                                                                                                                                                                                                                                                                                                       | Hits |
|---------------|----------------------------------------------------------------------------------------------------------------------------------------------------------------------------------------------------------------------------------------------------------------------------------------------------------------------------------------------------------------------------------------------------------------------------------------|------|
| #1            | “delayed appropriate therapy” OR “delayed therapy” OR “delayed antibiotic therapy” OR “delayed drug therapy” OR “delayed appropriate antibiotic therapy” OR “appropriate therapy” OR “appropriate drug therapy” OR “appropriate antibiotic therapy” OR “appropriate antimicrobial treatment” OR “appropriate antimicrobial treatment” OR “adequate treatment” OR “adequate therapy” OR “adequacy of treatment”                         | 682  |
| #2            | “delayed inappropriate therapy” OR “delayed inappropriate antibiotic therapy” OR “inappropriate therapy” OR “inappropriate drug therapy” OR “inappropriate antibiotic therapy” OR “incorrect therapy” OR “incorrect antibiotic therapy” OR “incorrect treatment” OR “inadequate antimicrobial treatment” OR “inadequate antimicrobial therapy” OR “time-to-therapy” OR “time to therapy” OR “Ineffective empirical antibiotic therapy” | 71   |
| #3            | #1 OR #2                                                                                                                                                                                                                                                                                                                                                                                                                               | 746  |
| #4            | (“Gram negative” AND (bacteria OR bacteremia OR “bloodstream infection” OR bacterium OR infection OR isolate OR culture OR pathogen)) OR pseudomonas OR Klebsiella pneumoniae OR “Enterobacteriaceae”                                                                                                                                                                                                                                  | 3549 |
| #5            | MeSH descriptor: [Gram-Negative Bacteria] explode all trees                                                                                                                                                                                                                                                                                                                                                                            | 5648 |
| #6            | MeSH descriptor: [Gram-Negative Bacterial Infections] explode all trees                                                                                                                                                                                                                                                                                                                                                                | 5765 |
| #7            | MeSH descriptor: [Bacteremia] explode all trees                                                                                                                                                                                                                                                                                                                                                                                        | 749  |
| #8            | MeSH descriptor: [Intra-abdominal Infections] explode all trees                                                                                                                                                                                                                                                                                                                                                                        | 939  |
| #9            | MeSH descriptor: [Urinary Tract Infections] explode all trees                                                                                                                                                                                                                                                                                                                                                                          | 2065 |
| #10           | MeSH descriptor: [Pneumonia, Bacterial] explode all trees                                                                                                                                                                                                                                                                                                                                                                              | 683  |

| <b>Search Number</b> | <b>Search Algorithm</b>                                                                                                                                                                                                                                      | <b>Hits</b> |
|----------------------|--------------------------------------------------------------------------------------------------------------------------------------------------------------------------------------------------------------------------------------------------------------|-------------|
| <b>#11</b>           | “Bloodstream infections” OR “bacteremia” OR “complicated intra-abdominal infection” OR “intra-abdominal infection” OR “complicated intra-abdominal infection” OR “complicated urinary tract infection” OR “urinary tract infection” OR “bacterial pneumonia” | 5597        |
| <b>#12</b>           | #4 OR #5 OR #6 OR #7 OR #8 OR #9 OR #10 OR #11                                                                                                                                                                                                               | 16,111      |
| <b>#13</b>           | <b>#3 AND #12</b>                                                                                                                                                                                                                                            | <b>71</b>   |
